# Supplementary material for: Testing the predictions of the Interpersonal-Psychological Theory of Suicide in a sample of female cancer patients
Source: Research Square preprint supplement (doi:10.21203/rs.3.rs-6688154/v1), 2025-07-01
Supplement: Supplementary file 1 [file 03a8a05caa9e0c50a627d609.docx]

**Table 7.** Multiple linear regression equation predicting suicidal intent (*n* = **194**).

| Predictors entered in set | *F* | *df* | Adjusted *R2* | *b* | *t* | *p* | *r* | *sr* |
| --- | --- | --- | --- | --- | --- | --- | --- | --- |
| 1 | 41.35 | 2, 191 | .29 |  |  | **< .001** |  |  |
| Active Ideation |  |  |  | .000 | 9.045 | **< .001** | .549 | .547 |
| Fearlessness about Death |  |  |  | .000 | -0.333 | .739 | .057 | -.024 |
| 2 | 39.19 | 3, 190 | .37 |  |  | **< .001** |  |  |
| Active Ideation |  |  |  | .436 | 10.786 | **< .001** | .549 | .616 |
| Fearlessness about Death |  |  |  | -.001 | -.226 | .821 | .057 | -.016 |
| Active Ideation x Fearlessness about Death |  |  |  | -.035 | -4.962 | **< .001** | .032 | -.339 |

Note: In bold: p < .05. *r* = Zero-order Correlation, *sr* = Part Correlation. *n* is smaller compared to the baseline sample due to missing data.
