# Supplementary material for: Testing the predictions of the Interpersonal-Psychological Theory of Suicide in a sample of female cancer patients
Source: Research Square preprint supplement (doi:10.21203/rs.3.rs-6688154/v1), 2025-07-01
Supplement: Supplementary file 3 [file 099d3a667e70ac182cf22973.docx]

**Table 5.** Multiple linear regression equation predicting passive suicidal ideation (*n* = **194**).

| Predictors entered in set | *F* | *df* | Adjusted *R2* | *b* | *t* | *p* | *r* | *sr* |
| --- | --- | --- | --- | --- | --- | --- | --- | --- |
| 1 | 38.88 | 2, 191 | .28 |  |  | **< .001** |  |  |
| Perceived burdensomeness |  |  |  | .079 | 4.070 | **< .001** | .477 | .282 |
| Thwarted belongingness |  |  |  | .032 | 3.316 | **.001** | .498 | .233 |
| 2 | 26.86 | 3, 190 | .29 |  |  | **< .001** |  |  |
| Perceived burdensomeness |  |  |  | .053 | 2.138 | **.034** | .477 | .241 |
| Thwarted belongingness |  |  |  | .033 | 3.422 | **< .001** | .498 | .153 |
| Perceived burdensomeness × thwarted belongingness |  |  |  | .001 | 1.535 | .126 | .415 | .111 |

Note: In bold: p < .05. *r* = Zero-order Correlation, *sr* = Part Correlation. *n* is smaller compared to the baseline sample due to missing data.
