# Supplementary material for: Testing the predictions of the Interpersonal-Psychological Theory of Suicide in a sample of female cancer patients
Source: Research Square preprint supplement (doi:10.21203/rs.3.rs-6688154/v1), 2025-07-01
Supplement: Supplementary file 4 [file 3a1da306d9523b01dadf13ce.docx]

**Table 3.** Treatment in the last 2 months (*N* = 199).

| Treatment in the last 2 months | *n* |
| --- | --- |
| None | 67 |
| Surgery | 26 |
| Chemotherapy | 48 |
| Hormone therapy | 49 |
| Radiotherapy | 18 |
| Immunotherapy | 17 |
| Other treatment | 43 |
| Total | 268 |
| Total number of treatments | 201 |
| Mean number of treatments  (all participants, *N* = 199) | 1.01 |
| Mean number of treatments (participants in treatment,  *n* = 132) | 1.52 |
| Range of treatments | 0 - 5 |
