# Supplementary material for: Testing the predictions of the Interpersonal-Psychological Theory of Suicide in a sample of female cancer patients
Source: Research Square preprint supplement (doi:10.21203/rs.3.rs-6688154/v1), 2025-07-01
Supplement: Supplementary file 5 [file 7e663c2e803ef6fbc811398c.docx]

**Table 2.** Type of cancer (*N* = 199).

| Type of cancer | *n* | *%* |
| --- | --- | --- |
| Breast | 121 | 60.8 |
| Gynecological tumors | 17 | 8.5 |
| Intestine/ rectum | 6 | 3.0 |
| Urological tumors (urinary tract, kidney, bladder, etc.) | 4 | 2.0 |
| Lung/bronchial tumors | 4 | 2.0 |
| Throat/ nose/ ears | 5 | 2.5 |
| Hematological diseases (leukemia, Hodgkin’s disease, non-Hodgkin’s lymphomas, etc.) | 24 | 12 |
| Skin (melanoma, basal cell carcinoma, etc.) | 9 | 4.5 |
| Soft tissue tumors (connective or fatty tissue, muscles, nerves, vessels, etc.) | 3 | 1.5 |
| Stomach, esophagus, pancreas | 3 | 1.5 |
| Central nervous system (brain, spinal cord, cranial nerves, glioblastoma, etc.) | 7 | 3.5 |
| Other tumor | 15 | 7.5 |
| Total | 218 |  |
| Mean number of types of cancer | 1.1 |  |
| Range | 1 - 4 |  |
