# Supplementary material for: Testing the predictions of the Interpersonal-Psychological Theory of Suicide in a sample of female cancer patients
Source: Research Square preprint supplement (doi:10.21203/rs.3.rs-6688154/v1), 2025-07-01
Supplement: Supplementary file 6 [file 9782b7c5633c3175c1b5f0af.docx]

**Table 1.** Sociodemographic characteristics (N = 199).

|  |  | *n* | Percentage |
| --- | --- | --- | --- |
| Gender | Women | 199 | 100 |
| Marital status | Married | 114 | 57.3 |
|  | In a relationship, unmarried | 39 | 19.6 |
|  | No relationship | 46 | 23.1 |
| Children | Yes | 126 | 63.3 |
|  | No | 73 | 36.7 |
| Professional status | Employed | 89 | 45.2 |
|  | Student | 49 | 24.9 |
|  | On sick leave | 6 | 3.0 |
|  | Other (e.g. no activity/ retirement) | 53 | 26.9 |
