# Supplementary material for: Testing the predictions of the Interpersonal-Psychological Theory of Suicide in a sample of female cancer patients
Source: Research Square preprint supplement (doi:10.21203/rs.3.rs-6688154/v1), 2025-07-01
Supplement: Supplementary file 7 [file ae2e94872dd390c5d0b8292c.docx]

**Table 6.** Multiple linear regression equation predicting active suicidal ideation (*n* = **193**).

| Predictors entered in set | *F* | *df* | Adjusted *R2* | *b* | *t* | *p* | *r* | *sr* |
| --- | --- | --- | --- | --- | --- | --- | --- | --- |
| 1 | 15.68 | 3, 189 | .20 |  |  | **< .001** |  |  |
| Perceived burdensomeness |  |  |  | .025 | 2.152 | **.032** | .385 | .154 |
| Thwarted belongingness |  |  |  | .006 | 0.939 | .309 | .380 | .068 |
| Hopelessness |  |  |  | .022 | 2.245 | **.026** | .405 | .161 |
| 2 | 18.90 | 7, 185 | .39 |  |  | **< .001** |  |  |
| Perceived burdensomeness |  |  |  | -.096 | -1.547 | .124 | .385 | .005 |
| Thwarted belongingness |  |  |  | .000 | 0.066 | .947 | .380 | .008 |
| Hopelessness |  |  |  | .009 | 0.409 | .683 | .405 | .030 |
| Perceived burdensomeness × Thwarted belongingness |  |  |  | -.002 | -2.160 | **.032** | .466 | -.157 |
| Perceived burdensomeness × Hopelessness |  |  |  | -.008 | -2.202 | **.028** | .471 | -.160 |
| Thwarted belongingness × Hopelessness |  |  |  | .006 | 3.954 | **< .001** | .527 | .280 |
| Perceived burdensomeness × Thwarted belongingness × Hopelessness |  |  |  | .000 | 5.061 | **< .001** | .578 | .349 |

Note: In bold: p < .05. *r* = Zero-order Correlation, *sr* = Part Correlation. *n* is smaller compared to the baseline sample due to missing data.
