# Supplementary material for: Testing the predictions of the Interpersonal-Psychological Theory of Suicide in a sample of female cancer patients
Source: Research Square preprint supplement (doi:10.21203/rs.3.rs-6688154/v1), 2025-07-01
Supplement: Supplementary file 8 [file b66c5b1c36438e8a09559571.docx]

**Table 4.** Descriptive statistics of variables relevant to the analyses.

| Questionnaire | *n* | Mean | Standard deviation | Minimum | Maximum |
| --- | --- | --- | --- | --- | --- |
| GCSQ-FAD | 196 | 11.44 | 5.49 | 5 | 25 |
| INQ-PB | 197 | 10.2 | 6.21 | 6 | 36 |
| INQ-TB | 197 | 25.86 | 12.3 | 9 | 63 |
| SSEV | 194 | 12.21 | 3.19 | 11 | 34 |
| SSEV-Pass | 194 | 2.63 | 1.49 | 2 | 12 |
| SSEV-Act | 194 | 2.23 | 0.8 | 2 | 10 |
| SSEV-Int | 194 | 2.1 | 0.49 | 2 | 6 |
| SDES-E | 193 | 8.44 | 3.66 | 4 | 18 |

*Note.* GCSQ-FAD = German Capability for Suicide Questionnaire - Fearlessness about Death, INQ-PB = Interpersonal Needs Questionnaire - Perceived Burdensomeness, INQ-TB = Interpersonal Needs Questionnaire - Thwarted Belongingness, SSEV = Suicide Ideation and Behavior Scale, SSEV-Pass = Suicide Ideation and Behavior Scale - passive suicidal ideation, SSEV-Act = Suicide Ideation and Behavior Scale - active suicidal ideation, SSEV-Int = Suicide Ideation and Behavior Scale - suicidal intent, SDES-E = Short Defeat and Entrapment Scale – Entrapment. *N* is smaller compared to the baseline sample due to missing data.
